# Supplementary material for: Inside the Scriptorium: Non-Invasive In Situ Identification of Dyes in Illuminated Manuscripts by Microspectrofluorimetry and Multivariate Analysis: The Crescenzago Choir Books (End 15th Century) as a Case Study
Source: MDPI journal article supplement (doi:10.3390/heritage6020108), 2023-02-15
Supplement: s1 [file s1]

Archive with 1 entries (1 files):
- heritage-2165339-supplementary.pdf
